# Supplementary material
Source: ML conference proceedings conference paper supplement (https://openreview.net/forum?id=wCwz1F8qY8)
Supplement: supplementary_material [file attachment]

## Sheet: model_dataset_summary
PDB ids of homodimer and heterodimer datesets used for training, validation, and testing of DeepSSInter.
Homodimer			Heterodimer
Training set	Validation set	Test set	Training set	Validation set	Test set
5FGL	2GFF	4MYZ	1A22	1AY7	5E3E
4YTO	5MU9	4BD8	1A6Z	1DCE	5E5U
5F4W	1VP7	4W98	1AGR	1DZB	5FIR
3UL5	4KE2	4NOG	1ALL	1JIW	5G1X
2FNU	6K6L	6GD1	1AVA	1LFD	5HKQ
2FD5	3ES1	5OKA	1B0N	1Q40	5MFD
5CQS	4JAQ	5V6G	1B34	1QFK	5NRM
2VEZ	6JMI	3BYW	1B5F	1SVD	5NUH
4GR6	2HF9	6CKM	1BLX	1T0F	5O9E
3LUY	3LMA	3LVY	1BML	1TMQ	5QU9
1T3C	1H82	3I7D	1BND	1UNL	5SZK
4IQD	2OU5	5W7Z	1BP3	1WHT	5VGB
1P1C	4DJB	4E1P	1BPL	1WRD	5W59
4L1J	6OIB	1LXE	1BUN	1Y4H	5Y4R
4RGB	5V6B	2B0A	1BVN	1Y56	5Z1G
5DZ8	3HZZ	3GK7	1CI6	1Y96	6B4H
3ICY	6RNQ	2QNE	1CPB	1YD8	6CH2
2PEX	6RS4	2IA0	1CXZ	1Z0J	6CWX
4KS9	6EOW	2FUE	1D2Z	1Z0K	6E3U
3MPR	4U12	5VUG	1D3B	2A1U	6FQA
3DYD	2O8N	1V9Y	1DP5	2BH1	6FV0
2O70	6L9U	4ML1	1DTD	2BKK	6GP1
4L57	2PKF	3GZI	1E50	2BYM	6GR9
4Z9N	4XLY	3OZY	1E6E	2CO7	6GU7
2F02	3BZH	6KJU	1E96	2FHZ	6HLV
3MSE	6MAG	1JE5	1EAI	2J59	6IKK
6K02	3IC6	6BL7	1EAY	2KIN	6ISC
4RKQ	1YYQ	5DD8	1EM8	2NTS	6J7M
2GRU	4RAZ	4P5W	1EUV	2OMZ	6JFV
6V45	1VK6	3ILX	1F34	2OUL	6K69
2GDZ	4YFI	6A4X	1F3U	2PMS	6K6B
3DO8	3HUH	6NPC	1F3V	2QKL	6MM8
3BID	1O5L	5MLT	1F45	2QNA	6NBL
1XGS	3BRE	5OTE	1F5Q	2V3B	6OTY
3THF	6C5B	4BES	1FFW	2WY3	6PFV
4BOL	1ZEE	4DOY	1FL7	2XFG	6U07
1VHM	3DP7	2DVK	1FLE	2YC2	1M10
2DI3	6EL2	3GWR	1FMA	2YIN	2RF4
6FJU	3HLX	4WWF	1FQ1	2Z6K	2YSU
2RGT	5W8X	5V5T	1FQV	2ZFD	3HO5
1T0I	1JOG	4ZI8	1FS0	3A98	3I08
4JKZ	5UBF	3GZR	1FXW	3C6P	3I4R
4MO4	3VRH	3HCY	1FYH	3CF4	3JV4
4FZS	1K20	2PMY	1G4U	3E1Z	3OED
3WW8	2EJB	5LUS	1G73	3FN1	3SOH
5ZTC	5YET	1IOM	1G8K	3G9V	3TCX
6O2K	4JEM	4I0K	1GL4	3G9W	3UUX
3QGU	4P2X	5FOL	1GZS	3H3B	4BPX
4LL7	6AQU	1V5V	1H1V	3IFQ	4CVW
5YHY	3CP3	1JKE	1H3O	3IMQ	4HXI
1Z4E	1ELU	4PKM	1H6K	3JVG	4U7P
6JCN	4GEK	6SF4	1HE1	3KW5	4XZV
3ES4	3FGE	1GO8	1HFE	3KXC	5D3I
3IPR	1WR8	2I00	1HL6	3L2O	5E66
3LFR	4I4K	3QOO	1HR7	3L82	5HYP
2Q3T	2I8T	4XXI	1HRP	3LXR	5J5C
5MS7	6YB7	2A1S	1I1Q	3MKQ	5L0W
6FDE	1P65	4XCV	1I2M	3MP7	5UQ1
4RP9	2R18	3K6M	1I8L	3PEV	5V7X
4XOH	2QYC	4X1Z	1IAR	3RCZ	5WAK
5VSC	4L6W	4L69	1IBR	3RJQ	5XN6
3KVH	3FKQ	4ZM8	1JK0	3TU5	6F8D
4J8Z	6JQ1	6JYX	1JKG	3ULQ	6JCK
1V0D	3V7O	4QPK	1JMA	3VF0	6L6R
5LY0	1NS5	5LXE	1JQJ	3ZHE	6L7R
3RNR	4BJQ	3T2L	1JQL	4A69	6LB8
2FXA	5FHK	3QAO	1K8R	4AXG	6M33
4K2M	2QEA	4YT2	1K9O	4C6T	6M3Q
3EC6	3N29	2I2L	1KA9	4C9B	6N50
5HCB	6HTO	6DRR	1KDQ	4DMU	6NE1
1HW7	4GGJ	3SZH	1KSJ	4F7G	6OAZ
5OW2	4HUZ	5TFP	1KVE	4G59	6P4O
4CQB	1I0R	2GZ4	1KXV	4H0Y	6P7S
3HMZ	3P2C	1CDC	1L0Y	4KAX	6QXP
4I9E	3ONT	2YOR	1L4Z	4KDT	6R0L
4C5K	5M88	6JHC	1LDJ	4MBG	6RQM
3K69	1D3Y	4WBE	1LIA	4OB3	6TZT
2I51	2QYA	2IGI	1LP1	4PEM	6UZK
6IPW	3HQX	6CFY	1M1E	4PER	6VAX
5VYQ	5ZYO	5X4T	1M2O	4RGW	6WAR
4KF9	4PIB	5JNQ	1MA9	4RHZ	6WH1
1BM9	4J6E	4Q51	1MHM	4RSI	6X61
3BPJ	5HWO	3HS3	1MQS	4U6U	6XA9
3B33	1JR8	7ODC	1MR1	4WJK	6Z20
6NCQ	5CQV	6GXS	1N0L	4XYD	6ZRN
1ID1	2EFK	2CH5	1N54	4YC7	7AYE
6PZJ	3I67	2YXN	1NF3	4YII	7BJV
3FBK	4C1B	2D8D	1NFU	4YN0	7CN7
1HE7	3LIN	4FBL	1NPE	4YN3	7E53
6R2F	3UXJ	6ESL	1NQL	4ZRL	7JTR
4UEJ	3CDL	3I38	1NRJ	5AQV	7JXU
2J6G	2JHE	5YKZ	1NU9	5AYR	7L15
4TRB	4H7N	3M0F	1NW9	5B4P	7MC6
5YQQ	3K6E	3QFW	1OC0	5CER	7NY8
1IA9	2I76	2E8V	1OEY	5DHX	7ODH
4JEN	4XCM	2OWN	1OF5		7OGG
3MOI	1VZI	3KH1	1OPH		7RBS
2GJG	2ZYD	1NP6	1OR7		1ZUD
1V05	3ND1	1KU9	1ORY		7K8Q
5K5Z	6HSD	1O4W	1OZ7
2I10	4YUC	2CSU	1P27
4IJY	6NPP	6JDH	1P57
2EEN	2XU6	3ZPX	1PDK
5YX3	3VK5	2HXV	1PPF
2GU2	2YZT	1T6S	1PVH
4H7L	4D7E	5YKX	1Q7L
1W33	1OJH	1TLK	1QGE
2PYT	3BJX	4PN0	1QUN
4PVC	5TGQ	2I71	1R0R
2QA1	6NU8	2WOJ	1R8O
6MX1	6IA6	5YNX	1RE0
4IZH	5X49	1UTY	1RKE
2QYH	3HNW	5T5S	1S1Q
3Q64	3CT8	3Q5W	1S64
6T7O	2HD0	3D40	1S70
5T95	5I90	3MTQ	1S9D
3I32	2WBT	4CN0	1SB2
2YXZ	4H8E	1VIO	1SDD
4C0F	3D7L	5D3A	1SMP
1NA6	2J6Y	1O0W	1SPP
3E5D	2WTE	1QC9	1SYX
1Z5B	2JHF	4ZOS	1T0H
2YQ2	2X3L	4FLA	1T0P
3L7H	2HXI	4CVR	1T6B
3NR1	4O9K	3ICA	1T6G
2JD3	3N4J	6EDI	1TA3
3A04	5BY5	6J64	1TBG
1YB2	3G4O	1D7M	1TDQ
3M92	4WP9	3OF4	1TE1
2ZDP	1T92	2A4X	1TGS
3VWN	3C8X	3EFY	1TH1
6GBS	2P97	3ITQ	1TNR
2W8M	6DZS	5TPI	1TQY
3HR0	4JBB	4JBD	1TUE
4R8H	2IMF	3M9L	1TY4
2HYX	4H40	2D7V	1U0S
2J7J	3TAI	5B1Q	1U58
5W8O	3IF0	1ULK	1UAD
4Y7I	6UWE	3WXY	1US7
4A1F	1MJH	3WUR	1US8
2AKO	4WD4	4RSW	1USV
5DPO	3KSR	5YTQ	1UUZ
6CDB	2GD5	4WPY	1UW4
3CM3	3HFT	2EQ5	1UZX
3EWN	2GS9	4MCJ	1V5I
4RDW	5FRK	1X8Z	1V74
6CBC	1THE	3PF6	1VF6
5XBI	3TX8	6EIM	1VG9
4EVY	4RO3	2NYI	1VIW
6L6G	1XAO	6O2U	1VRA
3NPI	6GZA	2PAQ	1VRS
4IHE	4XSL	2YXH	1W1W
3R40	3HXS	2F1L	1WMH
1SNN	5Z2H	3WW0	1WMI
1TU1	3WQM	4G9Y	1WPX
3DG3	5JBR	1IQ6	1WQ1
3G1P	4JJ0	4BOQ	1X3W
5IB0	2FGC	5BY7	1XB2
2G7S	2J6B	1V2X	1XG2
3RB7	4P8I	4IJ5	1XL3
3PGZ	1VZ6	3GWQ	1XOU
3NDC	6EK1	3W5S	1XQS
4ML9	2OB5	2I46	1XTG
6KO8	3GDI	1K4I	1Y14
4FUO	4ADN	4L8J	1Y17
3LY7	3UI3	6J52	1YC0
1ZNO	3EIN	3HGU	1YOV
3HDC	2YKF	2C7G	1YU6
2E0N	2A3Q	4US5	1YUK
1B0X	1E7L	3ADO	1YVB
2RCC	4IPI	5YDV	1Z5Y
3P3A	2BTI	3O1L	1Z92
3BBL	5XZQ	4WY2	1ZBD
3D82	4HZ4	2ZY9	1ZC4
4G1G	1MK4	6GX2	1ZHH
1R8J	1MP9	6I6S	1ZHI
3QP1	2OQR	6J6A	1ZUN
2QIB	3CET	3S6F	2A1J
4HES	6MR3	2OQO	2A5G
5U85	2BSJ	4XO6	2AHO
1XD7	5U8O	1UUJ	2AUS
6FLU	2H8G	4DYL	2AW2
2W1V	5AYV	1USC	2BEX
3QWM	4NJM	4RK4	2BKR
1ETO	1P9O	3GZ7	2C0L
2XCI	1OMZ	4YNZ	2C1T
3KGW	2PIG	2C0N	2C35
3GU3	4GN0	1Z05	2C5L
2FPN	1I5E	3UX2	2CA4
2GSL	3R4Z	3IIB	2CCL
5TQI	6A4V	5BP3	2CG5
2P64	6BXZ	4Q52	2CKL
4BWI	2PKE	1PVG	2COL
5C6K	3WQC	5I47	2D07
1VIV	1T82	1H6O	2D5R
4G7N	1R8G	2WAG	2DSP
3HDJ	4KR5	1VCH	2DYO
4PXE	3OA7	3IF4	2DZO
3COL	5YPP	6IF6	2EHB
3L5L	3JZ3	2ISK	2EJG
3R3P	4A6D	4NES	2ES4
2B81	5FQ1	5ZNM	2EX3
2XWS	1YM3	3CNG	2F2L
4E2G	4HCE	2OF7	2F3C
5HEC	1AZT	2O20	2F4M
4ITA	3HRY	4BT2	2F6M
5Z42	3CDH	2R0X	2F9Z
5NG7	3KMH	5GPO	2FCW
3CAX	2PQV	2QUD	2FH5
6PON	3LO3	5XII	2FIF
3WTD	3PLT	1SS4	2FJU
3US3	3ZN4	3LXZ	2FTX
4TX5	6NDI	6U1R	2FU5
2F42	4LNS	2JH3	2FUN
3IJ6	1EW3	2I9I	2FYD
5C82	6HIU	1MSC	2G45
2NS9	4MJ7	6L1L	2G77
3FRY	6K17	5KC8	2GAF
2NZ7	5I1U	1B63	2GRR
5Z72	2R6V	3BDK	2GSK
4ZQA	2ZCM	3GYB	2GUZ
5A9D	2C2A	2B4H	2H0D
1NOX	3DCM	2DPL	2H4C
2CMG	4U66	2GV8	2H7V
6FCC	3EXZ	4V0H	2HDI
3KGY	3HJV	5IS2	2HQS
5XZT	5GPE	3KS7	2HSM
2VVM	4RMB	2HXT	2HZM
1V84	1NA8	1R29	2I25
3D3K	5KIA	1QB2	2I26
5L1M	2GX5	5XKR	2I32
5MVS	1LR5	6HB5	2I3T
1QQ5	3QQA	1ZZG	2IBG
1TEX	4O5F	3BOQ	2IDO
2BKO	1LNW	2OMD	2IO4
5WTQ	3K1T	2OZH	2IYB
2QL8	4NN1	5XK6	2J0M
5WMK	5HCI	1TZB	2J3R
3CO5	3FZ5	5YTI	2J8X
4UUU	6C1X	1MML	2JGZ
2HZG	4XYB	1HCI	2LTN
5IPY	1T70	3C48	2NOJ
2ID3	1XG7	5G23	2O2V
1WTD	2G7G	4FEI	2O3B
3A32	3PG6	2D1C	2O8G
3G23	3TLA	5T3U	2O8V
1D2C	3MMH	4BEU	2O97
5ZMU	6DKH	6R1M	2OT3
6HZY	3KHN	3FJS	2OVP
6NMN	2IML	1KKO	2OXH
3BPV	5W6Y	4XSO	2OZ1
5HW4	4R85	3K0Z	2OZN
4ABX	1O4T	5I1V	2P28
3LSN	1ZJC	3HLU	2P7V
4XGW	1VH6	4YMR	2PA8
4Q7O	3SY6	4E12	2PBI
6MP7	6CF1	3WX4	2PKA
3UES	6C8R	4RXJ	2PMI
2WUQ	2Q0X	3B42	2PQR
4WL2	6SSD	1E6U	2PSM
1M0D	3CT9	1K4Z	2PTT
6HJM	6O15	3AGD	2PVD
5SY4	2YYH	5O70	2Q97
1K2E	3RPE	3QKC	2QB0
5ULY	3IM3	1MXR	2QHO
1YKD	1JAY	1DZ3	2QK7
2QJ2	3JSJ	4EQS	2QN5
6QPK	3OLJ	5VLG	2QSF
5GPK	1PC6	3E07	2QTW
4FE7	3O47	2EH3	2R17
4HOB	2VBW	6U11	2R25
3LWJ	2R78	2ZGY	2RD7
3C64	3CTA	2Q0Y	2UUY
3FZX	4HTL	3TYS	2UY7
5B3F	2FIQ	2IBD	2V1Y
1ULY	4L9G	5M97	2V5Q
4RS8	3LL5	4AYA	2V6X
3M8E	5UB8	3CCY	2V8S
3MBK	3C26	1QPP	2V9T
4CNN	2AKZ	4LJ3	2VDB
6CQO	1JOC	4S12	2VDU
6EAZ	1LGP	4JNH	2VDW
6ECW	3TV0	5X7F	2VE7
6D3V	5W8Q	4U83	2VJF
4QND	2ISN	3IDF	2VN6
3H8U	3HHP	3QPH	2VSX
3DMY	1ECY	4AEC	2VT1
4XVV		3LQN	2W07
1EYV		2RE7	2W2D
3ZU2			2W9Z
1TMX			2WBW
3I84			2WDT
6EFN			2WEL
5U8U			2WJV
3RH7			2WUS
1S28			2WY8
4E0I			2X7R
6CB2			2X9A
1O7L			2XG5
2I79			2XGY
3SEO			2XHE
6QCJ			2XHL
6NQZ			2XQR
2H1T			2XV6
3IB5			2Y3N
2GIY			2Y5B
4CII			2Y9X
5FEA			2YAJ
1VH4			2YCL
5HPH			2YGG
4ZOU			2YHO
6GUW			2Z2S
5XF2			2Z35
3ZG1			2Z3R
6IFQ			2Z5B
3OHS			2Z7F
3TC1			2Z8W
1P6O			2ZAE
3H1N			2ZET
3B81			2ZNX
1WIW			2ZSI
4R81			2ZZP
6O1E			3A1P
6HAV			3A58
1YOC			3A8K
1Z0P			3A8Y
4XXH			3AB3
3L7X			3ABE
1UTG			3AJI
2QGY			3AKO
5BY4			3AMJ
2GAU			3ANW
5YDD			3AON
1OC2			3AQC
3AIA			3AQF
4R5K			3AU4
3FGN			3AXJ
5YGE			3AYH
2I2W			3B0A
5J71			3B0B
4PHJ			3B0D
3KXA			3B0Z
5TD6			3B1S
4ICH			3BC1
5BZA			3BDW
6G8H			3BEG
3LS9			3BH7
2P25			3BJI
2OA2			3BK3
2H98			3BS5
4RNC			3BTP
2QM4			3BX1
3S5B			3C0R
4HMS			3C6E
2FZT			3C9A
5XAQ			3CBK
5ECD			3CJS
3VUQ			3CKI
4RIF			3CO0
2ARZ			3CPJ
4WML			3CPT
4V12			3CX8
4CIJ			3CZU
4NK2			3D31
2OPT			3D5S
4RUQ			3D6N
1NH8			3D7T
3W5W			3DA7
1U2W			3DBO
6J1O			3DDC
3F1L			3DGA
6BHC			3DGP
6NDS			3DI3
4RGK			3DLQ
2O2K			3DOM
5F64			3DPL
3BRO			3DRA
6EYX			3E0J
3B8X			3E90
6FFM			3EAB
2ASK			3EGV
5WSY			3EJE
3T8K			3F62
1NJR			3F6U
4L95			3F75
2NX4			3F7P
6JSD			3F8U
6KMO			3FAV
2I7R			3FFK
6KOS			3FGC
3QFL			3FGT
2P11			3FJU
3GLA			3FMO
3S2R			3FPN
5XEV			3FPU
4U1Q			3FXE
4ZKJ			3G3B
6CSV			3GA9
3O2R			3GC3
3HIE			3GCG
4DNX			3GFU
5I4Z			3GJR
5TS2			3GMW
3D0J			3GNI
4TT9			3GOV
2PUZ			3GQI
3EHH			3GTU
3NM7			3GXU
4RBR			3H0W
2XZ2			3H2U
3MCW			3H2V
2I7G			3H4S
4L9E			3H6S
4B4U			3H7H
5M48			3HCU
3P01			3HD8
2H09			3HI2
4I3M			3HR4
3UF6			3HVE
3SLZ			3HVQ
5VCS			3HZH
4C2E			3IEY
2VPA			3IF8
1JUH			3IHP
3L8D			3IHQ
4BT8			3IMA
2Z6R			3IWD
5E4V			3JTR
3EET			3K1I
2QIP			3K65
1H6U			3K75
3GYW			3K7W
5B52			3K9M
3R8E			3KCP
2OL5			3KDF
3KWP			3KF6
2B5G			3KF8
5LY5			3KP0
4USK			3KSE
3OC4			3KTA
4O7O			3KYJ
2GA1			3L0I
1VE2			3L0X
5F3P			3L51
2P4G			3L9J
5H78			3LB8
2A6A			3LBX
4C0Z			3LCB
4LQB			3LKU
6D61			3LMS
4EJQ			3LPE
3IA7			3LQC
6M9R			3M18
1MK1			3M1C
3ZRP			3M7F
2YC3			3MA2
1ZXK			3MCA
5ZLR			3MCB
2A8N			3MDB
3PPB			3ME0
1SFX			3MFG
6PAL			3MJ7
1VSG			3MKS
4UX7			3MML
1S3J			3MMY
3V67			3MSX
4RG1			3MZW
2F7V			3N1Q
2A3N			3N40
3G0K			3N4I
3ENC			3N7S
3PFB			3NA0
3K2N			3NA1
5LAC			3NBH
3PID			3NCF
2Y1H			3NQZ
4MYY			3NV0
4Y4S			3NVN
3O6V			3NYB
4PCQ			3O0G
6NO6			3O3O
2FVU			3O65
5FFX			3OAG
3NAU			3OCD
4Q95			3OG6
6Q8J			3ONA
4HA7			3ONG
4G3V			3OQ3
3GG9			3OSS
4ART			3OUR
2P9H			3OUX
2PA7			3P71
5W5A			3P8B
3CLK			3P9W
5JK5			3PCR
5H68			3PGE
2GO8			3PH0
5T3T			3PNL
2UUZ			3PNR
4NJH			3Q87
2OI2			3Q9U
5Z49			3QB4
5YM6			3QBT
3R4Q			3QDR
2V2G			3QF7
2GVI			3QHY
3QWB			3QML
2G8L			3QWQ
2J0W			3QWZ
1OOE			3R07
6B9F			3R7S
4K3Z			3R84
3ISX			3R8B
1P5Z			3RDZ
1ZX2			3RNQ
3NL9			3RPF
3DD9			3RUI
4G6C			3RZW
4BJA			3S9D
3M1U			3SF4
3E96			3SFY
5E57			3SGQ
3OU6			3SL9
3BT3			3T5X
2YF4			3T6G
2A61			3TAC
3ZF8			3TBI
2D5M			3TEC
6O3P			3TG1
5K3X			3TGO
1S99			3TGX
4IJA			3THO
1JYA			3TIX
3T7E			3TJ3
3F3K			3TKL
1IXM			3TL8
1I24			3TMP
3FJ1			3TNF
2XFV			3TU3
1YSJ			3TX7
3UFE			3UB5
1U7N			3UBU
5DZW			3UJG
3UV1			3UL4
5XLS			3UOU
2Y27			3UWS
3MX1			3UX9
1ZPS			3UZ0
5TW9			3V4Y
1VLJ			3VEP
3I3N			3VEQ
2F5G			3VIQ
2QHL			3VLB
4KY9			3VMF
2O11			3VRD
3OBW			3VV2
2F5J			3VVW
4YV6			3VYR
4E6W			3VZ9
3BXZ			3W3D
2PPQ			3WCY
1YM5			3WQB
1ZV1			3WRY
3ZFV			3WXF
5HIF			3WXM
3KTD			3WXX
2NO2			3X37
2V0X			3ZCB
3B4U			3ZUV
6GUG			3ZVQ
6UH2			3ZWL
6H00			3ZYI
2HMA			4A49
1NZI			4A5U
3BJA			4A63
3F6O			4A9A
2BLL			4AG2
2CV8			4AKR
5OLM			4AWX
4TUH			4AYM
1YDW			4AZ3
2FL4			4AZ8
4ATH			4B2C
6A80			4B8A
3UPL			4B93
1ZMB			4BD9
4FMR			4BH6
3JRT			4BI8
4UTU			4BJJ
6HIH			4BMP
2SPC			4BNR
3BM7			4BRW
4ZCD			4BRY
4M1H			4BVY
2AVN			4BX9
4OBU			4C4P
5AOV			4C7N
4ZB3			4C9V
5IDQ			4CCG
6J27			4CDG
3BOX			4CDK
2WCR			4CJ1
4A8E			4CJ2
6B9R			4CLQ
1X2I			4CO6
4BWV			4CRW
1N71			4CT0
4LUB			4CT4
1SH8			4CT7
4U1F			4CW7
4XOM			4CXF
2E50			4CZ2
3H6G			4D0G
3LYD			4D0N
2A2A			4DEX
6IS9			4DEY
4X82			4DFC
4A3T			4DH2
5LC4			4DHI
5N4K			4DID
2PQ7			4DKA
4CKN			4DS7
4UWM			4DVG
4R6I			4DX8
2X5Q			4E18
2NRH			4E4W
1YG2			4E6N
1XE7			4EDA
2W7R			4EGC
3A6R			4EKX
1NVJ			4EMJ
5O5S			4EQ6
2W2G			4ETP
3TDG			4ETW
4QVS			4EUK
6KET			4EY8
5HS7			4EYY
5N06			4F8C
4O8B			4FOU
4WIK			4FP9
3G2B			4FXW
4UQU			4FZV
3P0U			4G01
5FF5			4G6T
2C4I			4G6U
6GNA			4G6V
5NEN			4G7X
4CNG			4GAF
5LQ4			4GEH
6N0B			4GI3
3ISQ			4GMJ
2PRV			4GN5
2F07			4GOK
6S4Q			4GOW
3MCP			4GTV
3MF2			4GZR
5FPZ			4H5S
3R0A			4HCP
4MYM			4HDS
3HNO			4HFF
3BE6			4HI9
3PMR			4HOP
2GYS			4HPM
3L9F			4HRL
1Q8M			4HRN
4ZKY			4HST
4J2Q			4HWI
3GRZ			4I0W
2G3A			4I0X
3FLD			4I1N
6UK3			4I1S
5FCN			4I6N
3T1S			4IAO
1VR7			4IC7
5ZKT			4IEF
4MZY			4IG7
5CYV			4IP3
3C07			4ISO
3LKW			4IU3
1LWJ			4IUM
4ZR8			4IYP
2B69			4IZA
2QMA			4J2Y
5EY0			4J38
4PG7			4J4L
4OPF			4JDE
6INX			4JE3
3Q34			4JE4
4JP4			4JHP
6JPT			4JOI
3NO7			4JQU
2ID6			4JVS
3EOF			4JW2
2ZTJ			4JW3
5SV2			4K12
3NQK			4K5B
3VMK			4K90
3EA0			4KBM
2GOP			4KBQ
4ACI			4KDL
1R0V			4KFZ
6XUO			4KHA
4K0D			4KHB
1S4C			4KJY
4FDA			4KRD
6AGW			4KRM
3HE0			4KSK
1U07			4KT3
1KYQ			4KT6
6F1E			4KVG
1O6T			4L0P
2OU3			4L2I
2Y7P			4LAD
5UUO			4LJP
2I7H			4LLO
6BMA			4LO8
5K4W			4LQW
2FT0			4LV8
5DOR			4LWS
4QBN			4M1L
5G5C			4M6B
3C9U			4M6W
4OKI			4M76
2Y8V			4MH0
3X27			4MIT
2PYW			4MJS
3BDD			4ML7
5RUB			4MRT
5XSP			4MS4
6K4E			4N6O
3IFE			4N6R
6AMG			4N88
2AZJ			4N9O
4DZO			4NC0
5WHM			4NC2
6IKN			4NI2
6G96			4NIK
1TFE			4NIY
4J42			4NKG
3K3C			4NOO
3EJK			4NQW
1GPJ			4NRH
5FO5			4NTQ
3DET			4NUT
5FS4			4NZL
2PJS			4O4B
1OYS			4OB1
3WMD			4OH8
2F2E			4OI4
1TV8			4OIC
5YJW			4ONS
2P4W			4OWP
1UC2			4OY2
4MV2			4OYD
5VQF			4P3Y
4KK0			4PEQ
3IP3			4PHT
2J66			4PJ2
3KDW			4PKH
4UII			4POU
1W8I			4PRO
4PE0			4PW9
6Q4W			4PXH
4IYS			4Q35
1VL7			4Q57
3OZW			4QAM
2ZSJ			4QJF
2PN1			4QJV
5O6T			4QLP
2DX0			4QPL
5M8B			4QT8
2PHN			4QTU
2PZ9			4QXA
1X6I			4QXF
4IJ7			4QZV
4KQD			4R11
6UUT			4R1D
6FV4			4R40
1Y7R			4RCA
2E8E			4RE1
3L7W			4RLW
3C3M			4RS1
6VUD			4RV0
4UAB			4SGB
4E4R			4TPS
2YSK			4TQ0
3IC9			4TSH
3OHE			4TVQ
4GBJ			4TVS
4RT5			4TXO
3F6V			4TXV
5E4B			4U4P
6GQD			4U5Y
2OP5			4UAF
2P2U			4UDM
4K8W			4UEC
2G39			4UEM
5B7G			4UI1
3CRJ			4UIP
2GI3			4UJ5
3PZJ			4UN1
1O22			4UQZ
1W53			4UY2
4AX2			4UZY
1YOA			4UZZ
5FYA			4V0X
4H08			4V3E
2G9W			4W2Q
4KL6			4W4K
3DUW			4W6X
1Z84			4WFC
3MGG			4WKV
4PON			4WKZ
5OMD			4WLQ
3V6G			4WNH
2C0D			4WP5
4UVQ			4WV4
5JAZ			4WWA
4HZI			4WXA
3BL4			4WZ3
1HYO			4X33
4PZ1			4X57
4YRD			4X86
4MQ0			4X8K
3MD7			4XA9
2HVG			4XAX
3FTB			4XD9
1M7W			4XDN
1ZO2			4XGA
2OZE			4XH9
1OI2			4XHU
3E4V			4XL5
4D9B			4XLG
5VXE			4XOI
3NI0			4XWJ
1ZHS			4XXB
1N7Z			4XXW
4RHP			4Y11
4E09			4Y2O
2RC3			4Y5O
4RI1			4Y7M
6U0I			4Y7O
3C85			4Y97
5B1N			4YDO
1KU2			4YDY
1OAA			4YGA
5FIY			4YGD
3E5U			4YH8
5J1J			4YIQ
3V8D			4YJZ
4YER			4YK8
6HAT			4YOM
5H4S			4YR8
3E4C			4YX5
6D0A			4YXC
4HEH			4Z94
6I6M			4ZDT
1T5B			4ZGJ
1R7J			4ZGQ
3QBM			4ZHA
4ASJ			4ZI2
3LED			4ZIR
4HXT			4ZJV
3GMX			4ZKB
1BK5			4ZLB
3DYT			4ZLT
6HBS			4ZN3
2PK3			4ZOQ
4Y6X			4ZQK
1SD4			4ZQU
6NJC			4ZRJ
4J3C			4ZRQ
4CVH			4ZV0
3O2I			5A5H
3HSK			5ABV
5X14			5AIE
4XO1			5AQB
4LXQ			5B3G
2WMM			5B5W
3IC3			5B64
4FCJ			5BMU
3C18			5BOP
3S5R			5BRK
3A7O			5BW0
5Y7D			5BWD
6N5Z			5BWM
3S84			5BY8
3FBG			5BZ0
5ZBJ			5C1M
5L0L			5C2J
2GUH			5C2U
5AN6			5C4V
4NZ5			5C5B
4LSM			5C6G
1VJG			5CAW
3BQ3			5CAY
4XI2			5CBN
2P3W			5CHL
5LKB			5CM2
3H95			5CM9
2WI8			5CW5
2OX6			5CZF
2IV3			5CZO
2FE1			5D1M
4WJM			5DA7
3G7Q			5DC9
4JB7			5DCQ
6A0K			5DHM
2HQ7			5DI3
3U5V			5DJU
3GW4			5DMB
1Q08			5DMR
3JW4			5DO9
1R0M			5DOB
4EZF			5DOI
3QAV			5DQS
5HLY			5DUD
3DXI			5DYN
2FQ4			5E8C
4JOQ			5EJD
3SZ3			5EQL
6I6E			5EU0
4M0Q			5F21
3OLO			5F3X
5H6T			5F5S
4J40			5F5T
4YH6			5F72
1M0W			5F9D
2QV2			5FFG
1DQN			5FFN
4OBX			5FQ2
2ZB6			5FWY
3HSY			5G15
4J6V			5G37
5KH0			5GHS
3NDO			5GNA
2P7N			5GPY
4DKK			5GY2
3I26			5H65
2OSO			5H92
4J29			5HE9
3BHQ			5HFT
5VZ3			5HPY
2PX0			5HXG
2E1N			5I4H
3NQO			5IIB
4XZ7			5IJD
3GP4			5IKF
2RBC			5IKJ
4Q3O			5IML
2D6Y			5IMO
3GUZ			5IOH
4QDS			5IP4
6URC			5IRC
2GNN			5IUS
3CHV			5IVA
3ER6			5IWB
5D6O			5IXD
3AU0			5IXI
1LC5			5IXM
5KCK			5J03
6VTV			5J1M
6K5G			5J26
3LSJ			5J4A
5C1F			5J4S
6Q62			5J7C
6FM3			5J8Y
1SJY			5JCZ
3D8U			5JEN
2Y3W			5JFZ
5F6R			5JG6
1C8U			5JJD
2RAS			5JKE
4ZCR			5JKT
6E12			5JNO
3B48			5JP1
3G2M			5JP3
1VPB			5JQS
5K8B			5JSB
1KZQ			5JSN
5WAN			5JW7
2DKJ			5JW9
3E03			5JYL
3IX6			5K04
4C08			5K0H
2GBO			5K35
5AL7			5KBX
5Y9Z			5KEW
4O6Y			5KNH
1ZED			5KP8
1IUJ			5KVE
2X0D			5L0Y
2HN1			5L21
4BRC			5L3R
3MG1			5L3S
2OKU			5L6W
5NO5			5L8H
2W31			5L8L
1TJ7			5L9Z
1Y9W			5LDA
3AGC			5LGD
6GYG			5LHR
1EXT			5LRW
6BXO			5LSB
3LTM			5LSI
1KOB			5LSL
6EP3			5LWF
5XV0			5LXV
3G80			5LZ3
1XMA			5M0Y
2P35			5M2S
2HQL			5M4Y
6ENO			5M70
4EW5			5M72
3WDP			5MAD
3AAB			5MAK
5KPG			5MBM
1XKU			5ME5
2HR3			5MFC
2VQ2			5MG8
2I5E			5MN2
1EVX			5MRV
2DM9			5MTN
4XIV			5MU7
2RDP			5MXA
5EO6			5MY6
3H3M			5N47
3S8I			5N48
3LCM			5N5P
3CEW			5N92
2II1			5NBT
3BNK			5NCM
5FAI			5NH2
3K9J			5NJB
2WRA			5NKK
3GBY			5NKZ
4MK6			5NUS
2FMY			5NVL
6CPB			5O74
3DI4			5OE7
2BJI			5OED
5K87			5OEN
4MZA			5OJW
6HHN			5OMN
1U60			5OP1
6IZ2			5OQR
4YAP			5OVW
2E0T			5OW0
5GZS			5SV3
1IED			5SVH
2B06			5T20
5U5N			5T46
4MT8			5T48
2AQ6			5T51
5Y69			5T86
2R5O			5T87
3OY2			5TB5
5UL9			5TET
2AMU			5TQB
2X7X			5TUU
2ESS			5TVO
2HQQ			5TVQ
2P8I			5TXK
3EN8			5TZN
3DRW			5U6J
4FP4			5U9M
1ZKE			5UIW
3K4O			5UK5
2GIB			5UN7
2VAJ			5USF
2HKU			5UWC
4FRF			5UXX
4LTB			5UZU
4ZFV			5V7P
4EBJ			5V8W
3KMI			5VAK
2GK4			5VBN
1UZ3			5VID
5UEJ			5VIP
6U1B			5VJ7
3RHG			5VPD
6SYH			5VXM
1U6L			5VXZ
4AFL			5VZT
3BEX			5W3X
1T06			5W7C
2NX9			5W83
3KZP			5WB5
3ABH			5WB8
3LYX			5WEZ
3M1E			5WFI
3CQJ			5WFN
6OKH			5WP3
4RYK			5WRV
2P8J			5WSU
1CMB			5WUR
2XZ9			5WWL
4WX0			5WWO
2C3N			5WXL
3T38			5WY5
4MUO			5WYL
6O14			5X0W
3E97			5X4L
2OZJ			5X5W
3SQN			5XBF
5GOM			5XED
3NWC			5XLD
4ZJ9			5XNS
6BQC			5XQZ
2QNT			5XRW
2BZ1			5XV6
3DSB			5Y04
3TRT			5Y1Z
3W6P			5Y27
1OA8			5Y2Z
4TQ2			5Y38
1I49			5Y80
3IKH			5YA2
6SBS			5YAH
4WJT			5YIX
1ZH8			5YWR
6H40			5Z5K
2C1L			5ZNG
3L2B			5ZQ4
2NVW			5ZTB
3I5C			5ZWL
1ZCZ			5ZZA
4RZY			5ZZB
1MWQ			6A2U
1DLE			6ACI
2CH9			6AO5
3N3M			6APX
3FCG			6ARQ
6AKJ			6ASR
2FBQ			6ATG
3RQB			6AZP
3PKO			6B12
3LC0			6B4F
3AXB			6B58
2XPW			6B8Q
6J9K			6BCB
5X8S			6BJ5
2ZU9			6BMT
4NEY			6BN1
6B3V			6BSC
2R4I			6BX5
2ZIG			6BXC
3DF8			6BYN
4O1E			6BZG
3IN6			6C0B
3CJP			6C12
3KUV			6C7Y
1NKI			6C90
3KU7			6C99
2B1Y			6CH3
2AQX			6CP8
3ITF			6CP9
6QLA			6CZQ
4EUN			6D0I
1GXL			6D4P
4CP8			6D67
6BK4			6DBG
5TG0			6DEX
3ECY			6DFL
3W6S			6DGF
5C9N			6DKM
2IKS			6DLM
1MV8			6DRH
2E7J			6DXO
3MAH			6DY3
2OPK			6E2Q
5ZYF			6EA3
2JEE			6EBY
4HAC			6EG1
4DZH			6EJP
4OTN			6EKK
5VN4			6EPI
1VI6			6EPK
1BGF			6EPP
6OUX			6ET3
2IID			6F3Z
3JTW			6F4J
1WY5			6FC0
5EVC			6FC2
3LBE			6FC3
2JBX			6FF3
6ER1			6FFA
3IWA			6FGE
2CO3			6FHP
2QKO			6FNO
4XZZ			6FOL
2QSX			6FP6
4ZSI			6FP8
5J4F			6FQB
2NP5			6FYH
4XQC			6G3W
4UUL			6G4J
2OPO			6G6L
5NG9			6G8R
4ZMU			6GBH
1PCF			6GGR
3D5P			6GH8
2DGJ			6GLC
4AGH			6GOW
3S0Y			6GVC
3P14			6GXZ
4YIF			6GZS
3CZ8			6H16
3F6G			6H1F
3TD7			6H2V
5B5X			6H4B
1NXH			6H5E
5UJD			6H9N
4TR7			6HAR
4CVQ			6HEI
2RD9			6HER
3G16			6HUL
3MGK			6I1D
3E3M			6I1S
1JBG			6I3F
5HNO			6I6J
1S4K			6IBL
3NJH			6IF2
5KVS			6IF3
5W7P			6IGX
4KRW			6IHJ
2ZCX			6II6
5Z9R			6IMF
2PTF			6IN7
3CEX			6IRD
1HUL			6IWB
5TPR			6IXX
6N9I			6IYB
1G0S			6J0Y
2DTJ			6J6X
4M03			6J71
2F5T			6J7B
6AZ6			6JAU
1BYR			6JB8
2CJG			6JD6
6DAO			6JH0
4LUK			6JHW
3T9O			6JLE
6FT5			6JZE
2C5J			6K06
5HC0			6K81
1Y4J			6KBM
5F47			6KBR
1NXM			6KIP
5FT0			6KM7
5WRR			6KR4
3GW2			6L4O
3OPC			6L4P
4RLZ			6LNM
6RYK			6M7L
4JHR			6MCQ
2HQ9			6MHM
1UI5			6MIB
4TSD			6MOF
6QP1			6MRK
3BGU			6N4N
2WUZ			6N9D
5VOG			6N9G
4NTD			6NJD
4HHE			6NRR
1PZS			6NRW
2QLZ			6NVY
5FEY			6NYP
3HTR			6O38
5EK5			6O3C
1SRQ			6O6E
6MJ1			6OAM
3D3R			6OAR
2E2O			6OB3
4XHY			6OB5
3IE7			6OBP
4ZIL			6OD1
4LIT			6ODD
3RH2			6OKD
2IVY			6ONB
2QQ6			6ONU
2IJL			6OP8
4GEL			6OQ6
4EPI			6OQ8
6V77			6OVM
5JUI			6OX6
2C5A			6PCU
2IQT			6PGV
1GXR			6PNQ
1ZRN			6PW1
1O6A			6PX5
3W07			6QCB
3SL7			6QFC
3CBY			6QGY
6CYZ			6QJ2
5MQ8			6QSP
6E68			6QSR
2IPB			6QTA
5KEF			6QTB
2ZMF			6R3V
3ORU			6R6O
4IRY			6R7T
3FSD			6R8K
2EVV			6RGY
4JLE			6RPT
2VX8			6RTY
5D18			6RVC
2GD9			6RYA
1U7I			6S08
6SJ8			6S29
4WT5			6S6D
3CKJ			6S9J
6HS0			6SAK
5WK0			6SGE
5IG0			6SH7
2WE8			6SJ5
5EGN			6SJA
2FA1			6SR6
2ETH			6TKZ
5GOX			6TOU
2G84			6U12
4FGL			6U28
3T9Y			6U55
4BG7			6UMT
1V58			6URV
5EYN			6V7M
6E28			6VCM
3LWC			6VTM
4V23			6VW8
1MKF			6XZ6
1PFO			7CEI
2GE7			1C9T
2VW8			1G6V
4KQI			1GH6
6CUJ			1GKA
6C3R			1GXD
2OV9			1HWP
4ZO2			1II8
6JVV			1IQK
2YVE			1IXS
3IB7			1JCH
1QOL			1JOW
2Y43			1K8I
2PG3			1KFX
2NXV			1MBV
2RL8			1MIU
2Y4J			1O96
3HPX			1OGY
2HA9			1P69
1KA2			1QA9
1OF8			1SC5
3NJC			1SHY
1GS5			1SK6
3QH9			1X86
4BLG			1Y0V
4YZO			1Y64
1DCF			1YKE
3OGH			1ZT2
1PEA			2AUH
4EP4			2AYO
3M84			2B3T
1K3S			2CH4
3S9F			2CKZ
2I4L			2DCU
3SIB			2E32
5C4Y			2GRX
4YZZ			2GY7
3G12			2IYD
4A7W			2JKI
3VOL			2PF4
2PIM			2PJW
5U4S			2PM9
6CBN			2Q3N
2P84			2Q7N
6NCS			2QKW
5GVV			2RAX
3KKF			2UZY
2CUN			2V55
4RFQ			2WQZ
6GHS			2Y9Y
4JYK			2ZHX
1SDO			2ZIX
3G1W			3A59
1H72			3A7A
1VB5			3AV0
6A45			3BG0
1WOV			3CJB
3VCN			3CWZ
6H65			3D0H
2V0O			3DOF
2G7L			3E9J
1VLR			3ENH
3E15			3ESW
2I39			3ETB
3TFQ			3EWE
2QLW			3FBN
4BK0			3FMP
3CWR			3GTY
3BPK			3GYX
3ON4			3H5C
1HT9			3HGK
1WKQ			3HW2
6F8H			3IA3
4NOI			3K5B
5I34			3KQ4
3KEO			3L1Z
4DUN			3ML0
4AE7			3MV3
3KIZ			3MX0
2OIK			3NMZ
3QTH			3NVM
2EWN			3O6B
3GR5			3OC3
1H65			3PHF
6J0E			3PVB
3O27			3QLV
2G3B			3R4D
2OD4			3RTR
6CUM			3S48
2YZK			3S8V
1G60			3SQB
1TWU			3SQV
3F6A			3SU8
3D0T			3SY2
3OCU			3TNQ
3EXA			3U73
6VIG			3U7U
1TBX			3ULA
4KWA			3V3K
3OOP			3VLF
3ZN3			3VX7
1Q47			3VX8
1M0U			3WEE
3SK2			3WHL
5KS7			3WO3
1EVY			3WOF
6K63			3ZL7
4ZUA			3ZXU
3N8B			3ZYJ
1PN2			4ARZ
1T11			4ATB
1XLY			4BFI
4HBE			4BIK
6CPD			4BOZ
1QSD			4BWF
5JIP			4C0A
2BJN			4C5H
3CT6			4CHT
4MUR			4CV5
2WOZ			4F0A
5BY1			4FGI
3HHF			4FMB
6ALL			4G8X
3X0I			4GUP
3NMD			4H4K
3GHF			4HGK
6FPF			4HLQ
2YUT			4HUN
2B8M			4I21
2BII			4IOP
2V57			4IRU
4FX0			4IZ5
3WSC			4JEU
1N2S			4KC3
6AQE			4KUM
3N4S			4KVO
5A10			4KYI
3HG9			4LI2
5SZG			4LN4
2O7T			4LQS
4QIN			4M4R
2GEY			4M7E
1VMG			4MQT
3L3U			4MYW
5YJL			4NZW
5XLV			4O9T
1BEC			4OFY
3BRC			4ORB
3KPH			4PBW
5J4U			4PC7
3GD6			4QTS
2JDJ			4RHB
4TWK			4RIX
6DXS			4RWS
6HQ7			4S0T
3NFT			4TU3
3S2W			4U0Q
3GWB			4U1C
6E85			4U2X
6FRG			4U39
6F7U			4UOW
3AJF			4UX3
6BVC			4V0O
5XAV			4V2C
4Q0H			4W2O
3VP5			4WLP
1ZVP			4WUR
5EPW			4WWX
3CEQ			4WYB
4XUV			4XLW
2AYU			4XT3
3QWE			4XVP
1CBY			4Y61
5HH0			4Y66
6TGK			4YFD
4Q6U			4YGE
3JYU			4ZKC
3KAE			4ZV4
4G6Q			5AAW
5HHE			5AJD
2QSI			5B2G
2HOX			5BOZ
2R8W			5BQM
2CAR			5BV1
5I0Y			5BWA
1QUU			5CE3
5FSH			5CHV
3CNI			5CK3
4NSW			5CLQ
3IR3			5CMN
3FRS			5CXC
4Z1D			5DA0
3NJD			5E6P
1YOY			5ECJ
3FH1			5EW5
3UEP			5FBW
4OR8			5FR2
2EUI			5FXY
5VYK			5G53
5NFO			5GVE
5X89			5HVG
2Z99			5HY3
3KQ5			5HYW
6O2D			5IEG
4HW0			5IHL
6K62			5J3Y
2QKP			5JJW
4YQD			5JR7
5UKV			5JTJ
4P5E			5JTV
3KNZ			5LGU
1NXU			5LON
4JG9			5M95
1TXG			5NCN
4P5X			5NPW
6HHK			5NRO
3QXB			5O2S
1O69			5O85
2G3P			5OBZ
5LXN			5OHN
2B5W			5OY4
1SKV			5TBK
3M9Z			5TPZ
3MIL			5UN6
3ROT			5V52
2ZOD			5VAE
2YMM			5WMM
2CYE			5WTS
4K3L			5WY8
2ILK			5XJX
4OKE			5XKN
3PMC			5YH3
3WAE			5YVY
6RA0			5YY0
2X5H			5ZHX
3HZ4			5ZLZ
1PVM			6A3V
1GOI			6AGO
6OHI			6AJL
1O50			6ALX
1JGS			6AXG
5L0X			6B73
3O7B			6BS5
6SLL			6BUH
2J1D			6BYR
6HCD			6BZX
2HJ1			6CP0
1O75			6CWZ
3MVG			6DCX
6PKH			6DLD
2V6K			6DMA
5YJC			6DY0
3RBT			6F2W
4P52			6FUF
6D9T			6GCI
2E11			6GHB
3K32			6GS7
5VR2			6HT9
2QWV			6HTF
2RDC			6IKM
4Z1V			6IM9
2I02			6IRE
3SXY			6IXV
6JU1			6J07
2DLB			6JZZ
1NFP			6K73
6VZZ			6K8K
6S1W			6K9P
4N06			6KBE
3B5M			6KCR
5M33			6KE3
3SD2			6KMH
3O8S			6KMQ
2OOK			6KN9
5J0K			6KNM
3CKA			6KP3
5JIC			6KXE
5UCT			6KZ7
3DEW			6KZA
6JC4			6L1Y
5WX8			6L5K
3I6U			6L80
5YZ1			6L81
5T3A			6LBU
6ANZ			6LBX
1C0P			6LKI
6O6Y			6LOJ
5X2A			6LPG
3A16			6LPI
3FWZ			6LQO
3LHC			6LSA
2FRH			6LYE
3X01			6LYV
6AHX			6M01
4S3I			6M3I
1WV8			6M4V
4G5A			6M5I
5BNC			6MC9
3QDL			6O03
3LF6			6OAO
3DPJ			6OAT
3E8O			6OF7
4LDV			6OIH
6R80			6OQQ
6OKO			6OZ6
3LAS			6PAW
3FEG			6PJX
5NZO			6POL
6SG8			6PQK
4ZMK			6PZP
3RQ1			6Q6Z
3GB0			6QBA
4OI3			6QF7
3ERM			6QPQ
5FN8			6QUP
2OX1			6S8U
4OIV			6SAQ
2E7S			6SEH
2R11			6SEJ
3K0L			6SKU
4OPA			6SM5
3ZWF			6SMD
3HWP			6SNV
4ATM			6SNY
6W08			6SUA
5A8J			6SWT
4QLA			6T1W
1NI5			6TBN
3H8L			6TCA
2QPV			6THL
3AXS			6TRI
2YIM			6TRS
1TUW			6TUN
3FX3			6U08
3MCZ			6UL4
4GHJ			6UQQ
4CW5			6USM
1H99			6USV
3FF1			6V3P
6NOP			6VBG
4GQM			6VEK
6SNZ			6VJJ
6AEF			6W0V
3CAI			6W2L
2EJN			6W3H
4ME9			6W3I
6MXC			6W4K
2HS1			6W9A
3QP6			6W9R
3CC8			6W9S
3BCW			6WC3
5MH6			6WCW
5B00			6WJC
4C3S			6WMK
3B9T			6WMZ
4Q62			6WQX
4A5Z			6WTG
2ZEJ			6WUD
6CMV			6X07
3JUM			6X0A
2VEB			6X1G
1UIX			6X5P
5VVI			6X90
6GFL			6XF1
5C21			6XGZ
6FPD			6XMD
4YMH			6XOD
6GU1			6XPC
4PR3			6XWX
4RFA			6XZU
3LW3			6Y0A
5IVL			6Y32
3U9L			6Y3B
2FQ1			6Y4L
2P2S			6YA8
1RFY			6YEV
3D4R			6YGU
6C6N			6YJP
2YFA			6YP9
4KPO			6YPT
5XUN			6YQ8
4ES1			6YT3
3NKH			6YU8
5F2K			6YX5
2DG7			6YXG
1XSV			6YXJ
3CU3			6YXQ
3K6Q			6YYE
2FWV			6Z10
6FDM			6Z81
1ZUP			6ZBK
4DM7			6ZBV
3LB5			6ZDT
5HYZ			6ZDX
5F2H			6ZE1
4GYM			6ZEI
5K1R			6ZIE
5LY9			6ZL1
5KF9			6ZRV
4FYP			6ZSH
1K66			6ZUC
4PLR			6ZWA
2Q9K			6ZXW
1J5W			6ZZG
2RJZ			7AC8
1Y0H			7ANQ
3BOS			7APJ
3S6D			7AR0
3MQ0			7AX1
3G48			7AZB
6N0X			7B7S
5CDV			7B80
2R83			7BDW
4EO3			7BP2
2W6A			7BU5
1Q2H			7BV5
5N07			7BWT
5YGH			7BXH
2EGV			7BZK
2AUD			7C2F
4ZGC			7C2H
4JHC			7C96
2EV1			7CD8
6F6M			7CEG
4LPV			7CFX
3MGD			7CIY
4YAM			7CQ2
5V8S			7CQ3
3CXN			7CSL
6J4D			7CUI
3TBM			7CZD
4OVE			7D0S
6IE0			7D2S
3GFA			7D4B
4D79			7D5Q
3C2B			7D8B
4AG0			7D9X
3RMU			7DCD
6LH6			7DDX
3MZ1			7DEU
4UDS			7DG5
2AXW			7DHG
1JMV			7DMA
1R1T			7DNN
3HSS			7DO4
1XNF			7DYM
3AY3			7E36
5OL8			7E40
3NOQ			7EOW
1LQL			7EQX
4C0N			7F2R
5CXO			7F9L
2OD6			7F9N
4PU7			7FC3
6E5Y			7JHP
3LHQ			7JKR
6G6U			7JMS
4LMY			7JQV
4BJ1			7JR2
3FCD			7JTU
2E67			7JUM
4ESY			7JV1
1EI6			7JXV
3CLQ			7JZI
4B0T			7JZK
3TG2			7K84
4RFL			7KDC
3TP9			7KFK
5A3V			7KJI
5HFS			7KJS
4DMG			7KM5
2O38			7KP4
3EZ2			7KUG
3IGF			7L0G
3FET			7L3L
3QFM			7L5M
4C5W			7L97
3K67			7LAN
2NP3			7LC1
3KG0			7LC2
1ECS			7LDJ
2GYQ			7LKO
5HST			7LKQ
1S67			7LQU
3UT4			7LRQ
3NUA			7LT9
4Z67			7LVS
4MCW			7M0Z
2E5F			7M2K
2BOL			7M3Q
6FLS			7M3S
1M4R			7M5F
2RIQ			7MC9
2ZOG			7MIC
6D71			7MLM
3QXC			7MON
6OEI			7MXH
4DK2			7MXN
3Q2J			7MYH
2O4T			7N1N
1B8K			7N4N
2OOJ			7NE1
4DQ2			7NH7
5WYG			7NMM
5IXU			7NQA
1MBY			7NWK
3CJY			7NXC
3G36			7NXK
5X40			7NZ9
3IHT			7O3B
5XKT			7OK7
6JKG			7OQP
5IDB			7P8K
4E1R			7R86
3FCM			7R98
1KQP			7RBR
4X83			7RNI
3DMC			7S0Y
4GEW			7S0Z
5DI0			7SH3
4YDR			7VMU
5OA4			5F86
5H6Z			6KHS
3LAZ
1XQB
3BBD
3R6O
1FN9
4TOI
3DX5
4ZLH
2EBE
3C24
3EO6
5I95
2VI7
2X5C
5XSW
4I9F
3VS8
2VVP
1MR8
2DBS
1SQU
2GHV
4WUB
6GTO
3CU2
3HL4
2RIH
3U5W
4NK4
3EWW
2ZW5
3N2Q
1K3R
2YIJ
2DG6
4ZH6
2YN3
3EDP
2SCP
5F7R
1NKD
4YXP
3EZU
3FYN
2YK4
6F04
2RKK
5MPR
3ZFI
4CND
6VBB
1PDO
5FFI
3V75
3O10
3HA4
3P1T
1W23
2POK
5B5I
4JTU
3QS2
3RPP
4CZU
4OW5
4MV4
6GZW
3Q7R
2ZW2
3TQT
5YUG
6QLC
4XCZ
1T3J
3CJL
4MLG
3QWU
1TLJ
6EO2
1M32
2DDM
4O96
4I6Y
2NQL
3WRV
5HKL
2DY0
2HXO
3RET
5Z4Z
3F8M
2Q78
1Z9H
4L08
4NVS
3P0K
5UI9
5X2D
1XY7
1ZW0
2R3S
1FBL
3ZX6
2FZF
4HR1
2FQM
4YAG
1T98
5T40
6N91
3LZK
4DIQ
3LZ8
3BQX
3NE8
2PD1
4AYN
1T62
4RGP
4EIV
2ZVY
4TT0
3APZ
3FD3
3COV
4XLO
3QTA
2IT2
3TR0
6SIZ
2HIQ
3GFR
3HXJ
4HEX
3B1B
3OXN
6ENI
1ON2
5A04
3GMG
3LWD
5GZ3
4WPE
2NTX
[truncated: 1,379 more rows]
